# Supplementary material for: Predictors of Lifestyle Intervention Attrition or Weight Loss Success in Women with Polycystic Ovary Syndrome Who Are Overweight or Obese
Source: MDPI journal article supplement (doi:10.3390/nu11030492), 2019-02-26
Supplement: s1 [file s1]

**Supplementary Table 1: Intervention characteristics of included studies**

| Author  | Year | n                                                                                                            | Intervention type                                                                                        | Intervention duration                            | Time points                           | Appointment number | Appointment type                                          | Attrition | Weight loss                     |
|---------|------|--------------------------------------------------------------------------------------------------------------|----------------------------------------------------------------------------------------------------------|--------------------------------------------------|---------------------------------------|--------------------|-----------------------------------------------------------|-----------|---------------------------------|
| Moran   | 2003 | Commenced: 49<br>Randomised: 44 (22 LP, 22 HP)<br>Completed: 28 (14 LP, 14 HP)                               | Weight loss with HP (40% CHO, 30% P, 30% F) or LP (55% CHO, 15% P, 30% F) diet and weekly exercise class | 12 week weight loss<br>4 week weight maintenance | 0, 4, 8, 12, 16                       | 5                  | 1:1 dietitian                                             | 42.9%     | 7.7±0.7 kg<br>NS between groups |
| Moran   | 2006 | Commenced: 43 (22 CC, 21 FC)<br>Completed: 23 (14 CC, 9 FC)                                                  | Meal replacements for weight loss for all participants followed by CC or FC for weight maintenance       | 8 week weight loss<br>6 month weight maintenance | 0, 2, 4, 6, 8, 12, 16, 20, 24, 28, 32 | 11                 | 1:1 dietitian                                             | 46.5%     | 4.7±1.0 kg<br>NS between groups |
| Moran   | 2007 | Commenced: 27<br>Completed: 15                                                                               | Meal replacements for weight loss                                                                        | 8 week                                           | 0, 2, 4, 6, 8                         | 5                  | 1:1 dietitian                                             | 44.4%     | 3.9±3.6 kg                      |
| Thomson | 2008 | Commenced: 102<br>Randomised: 100 (32 HP, 34 HP/AT, 34 HP/ART)<br>Completed: 51 (14 HP, 18 HP/AT, 20 HP/ART) | HP, HP/AT or HP/ART for weight loss                                                                      | 20 week                                          | 0, 2, 4, 6, 8, 10, 12, 14, 16, 18, 20 | 11                 | 1:1 or group dietitian and exercise physiologist sessions | 50.0%     | 9.4±1.9%<br>NS between groups   |

ART: aerobic resistance training; AT: aerobic training; CC: carbohydrate counting, CHO: carbohydrate; F: fat; FC: fat counting, HP: high protein; LP: low protein; NS: not significant; P: protein
